# Supplementary material for: Analysis of Polycyclic Aromatic Hydrocarbons via GC-MS/MS and Heterocyclic Amines via UPLC-MS/MS in Crispy Pork Spareribs for Studying Their Formation during Frying
Source: MDPI journal article supplement (doi:10.3390/foods13020185), 2024-01-05
Supplement: s1 [file s1]

---

*Supplementary Materials*

*for*

**Analysis of Polycyclic Aromatic Hydrocarbons via GC-MS/MS and  
Heterocyclic Amines via UPLC-MS/MS in Crispy Pork Spareribs for  
Studying Their Formation during Frying**

**Yu-Wen Lai<sup>1</sup>, Baskaran Stephen Inbaraj<sup>1</sup>, Bing-Huei Chen<sup>1,2\*</sup>**

<sup>1</sup>Department of Food Science, Fu Jen Catholic University, New Taipei City 242062, Taiwan.

<sup>2</sup>Department of Nutrition, China Medical University, Taichung 404328, Taiwan.

\*Correspondence: Email address: 002622@mail.fju.edu.tw; Tel: +886-2-29053626

**Table S1.** Retention time and selected reaction monitoring (SRM) detection parameters of 20 HA standards and internal standard (4,7,8-TriMeIQx) using UPLC-MS/MS.

| HA compound                                                                                 | Retention time<br>(min) | Precursor ion<br>(m/z) <sup>2</sup> | Quantitation         |                         | Confirmation         |                         |
|---------------------------------------------------------------------------------------------|-------------------------|-------------------------------------|----------------------|-------------------------|----------------------|-------------------------|
|                                                                                             |                         |                                     | Product ion<br>(m/z) | Collision<br>Energy (V) | Product ion<br>(m/z) | Collision<br>Energy (V) |
| 2-amino-1,6-dimethylimidazo[4,5-b]pyridine (DMIP)                                           | 0.50                    | 163.1                               | 148.1                | 24                      | 105.09               | 37                      |
| 2-aminodipyrido-[1,2-a:3',2'-d]imidazole (Glu-P-2)                                          | 0.87                    | 185.1                               | 158.1                | 25                      | 78.05                | 37                      |
| 2-amino-1-methyl-imidazo[4,5-f]quinoline (iso-IQ)                                           | 0.70                    | 199.09                              | 184.12               | 25                      | 156.10               | 21                      |
| 2-amino-3-methyl-imidazo[4,5-f]quinoline (IQ)                                               | 0.81                    | 199.1                               | 184.12               | 27                      | 157.00               | 29                      |
| 2-amino-3-methyl-imidazo[4,5-f]quinoxaline (IQx)                                            | 0.67                    | 200.08                              | 185.12               | 28                      | 132.14               | 29                      |
| 2-amino-3,4-dimethyl-imidazo[4,5-f]quinoline (MeIQ)                                         | 1.45                    | 213.11                              | 198.09               | 27                      | 145.15               | 29                      |
| 2-amino-6-methyldipyrido-[1,2-a:3',2'-d]imidazole (Glu-P-1)                                 | 2.15                    | 199.1                               | 92.1                 | 36                      | 172.14               | 26                      |
| 2-amino-3,8-dimethyl-imidazo[4,5-f]quinoxaline (8-MeIQx)                                    | 1.23                    | 214.1                               | 131.07               | 41                      | 173.18               | 24                      |
| 2-amino-1-methyl-imidazo[4,5-b]quinoline (IQ[4,5-b])                                        | 2.10                    | 199.11                              | 183.92               | 27                      | 115.19               | 46                      |
| 2-amino-1,6-dimethyl-furo[3,2-e]imidazo[4,5-b]pyridine (IFP)                                | 2.62                    | 203.08                              | 188.17               | 25                      | 175.14               | 22                      |
| 2-amino-3,7,8-trimethyl-imidazo[4,5-f]quinoxaline<br>(7,8-DiMeIQx)                          | 2.51                    | 228.1                               | 131.13               | 40                      | 187.15               | 25                      |
| 2-amino-3,4,8-trimethyl-imidazo[4,5-f]quinoxaline<br>(4,8-DiMeIQx)                          | 2.68                    | 228.1                               | 213.09               | 26                      | 187.09               | 23                      |
| 9H-pyrido[3,4-b]indole (Norharman)                                                          | 2.82                    | 169.06                              | 115.09               | 33                      | 89.05                | 48                      |
| 2-amino-3,4,7,8-tetramethyl-imidazo[4,5-f]quinoxaline<br>(4,7,8-TriMeIQx) (IS) <sup>1</sup> | 2.82                    | 242.13                              | 145.09               | 42                      | 201.21               | 26                      |
| 1-methyl-9H-pyrido[3,4-b]indole (Harman)                                                    | 2.83                    | 183.09                              | 115.15               | 34                      | 89.09                | 49                      |
| 2-amino-5-phenylpyridine (Phe-P-1)                                                          | 3.02                    | 171.09                              | 127.13               | 30                      | 154.07               | 21                      |
| 3-amino-1-methyl-5H-pyrido[4,3-b]indole (Trp-P-2)                                           | 2.89                    | 198.11                              | 154.14               | 30                      | 181.08               | 24                      |
| 2-amino-1-methyl-6-phenylimidazo[4,5-b]pyridine (PhIP)                                      | 3.02                    | 225.1                               | 210.05               | 30                      | 140.08               | 54                      |
| 3-amino-1,4-dimethyl-5H-pyrido[4,3-b]indole (Trp-P-1)                                       | 2.95                    | 212.12                              | 195.14               | 24                      | 168.09               | 30                      |
| 2-amino-9H-pyrido[2,3-b]indole (AαC)                                                        | 3.13                    | 184.07                              | 140.13               | 33                      | 167.07               | 24                      |
| 2-amino-3-methyl-9H-pyrido[2,3-b]indole (MeAαC)                                             | 3.25                    | 198.1                               | 181.14               | 23                      | 127.13               | 38                      |

<sup>1</sup>internal standard<sup>2</sup>mass-to-charge ratio

**Table S2.** Retention time and selected reaction monitoring (SRM) detection parameters of 23 PAH standards and internal standard (Triphenylene) using GC-MS/MS.

| PAH                                | Retention time<br>(min) | Quantitative ion pair                             |                          | Qualitative ion pair                 |                          |
|------------------------------------|-------------------------|---------------------------------------------------|--------------------------|--------------------------------------|--------------------------|
|                                    |                         | Precursor ion > Product ion<br>(m/z) <sup>2</sup> | Collision Energy<br>(eV) | Precursor ion > Product ion<br>(m/z) | Collision Energy<br>(eV) |
| Naphthalene (NaP)                  | 7.90                    | 128 > 102                                         | 20                       | 128 > 78                             | 25                       |
| Acenaphthylene (AcP <sub>y</sub> ) | 14.5                    | 152 > 151                                         | 20                       | 152 > 150                            | 35                       |
| Acenaphthene (AcP)                 | 15.6                    | 154 > 153                                         | 20                       | 153 > 152                            | 20                       |
| Fluorene (Flu)                     | 17.6                    | 166 > 165                                         | 20                       | 165 > 164                            | 25                       |
| Phenanthrene (Phe)                 | 21.8                    | 178 > 176                                         | 35                       | 178 > 152                            | 25                       |
| Anthracene (Ant)                   | 22.1                    | 178 > 176                                         | 35                       | 178 > 152                            | 25                       |
| Fluoranthene (FL)                  | 27.9                    | 202 > 200                                         | 40                       | 202 > 201                            | 25                       |
| Pyrene (Pyr)                       | 29.5                    | 202 > 200                                         | 40                       | 202 > 201                            | 25                       |
| Benzo[c]fluorene (BcF)             | 33.6                    | 216 > 215                                         | 20                       | 215 > 213                            | 30                       |
| Triphenylene (IS) <sup>1</sup>     | 41.1                    | 228 > 226                                         | 30                       | 113 > 112                            | 10                       |
| Benzo[a]anthracene (BaA)           | 42.0                    | 228 > 226                                         | 35                       | 113 > 112                            | 15                       |
| Chrysene (CHR)                     | 41.6                    | 228 > 226                                         | 35                       | 228 > 227                            | 20                       |
| 5-methylchrysene (MCH)             | 47.5                    | 242 > 241                                         | 40                       | 242 > 239                            | 15                       |
| Benzo[b]fluoranthene (BbF)         | 55.8                    | 252 > 250                                         | 40                       | 125 > 124                            | 15                       |
| Benzo[j]fluoranthene (BjF)         | 55.8                    | 252 > 250                                         | 40                       | 125 > 124                            | 15                       |
| Cyclopenta[c,d]pyrene (CcdP)       | 58.3                    | 226 > 224                                         | 45                       | 113 > 112                            | 15                       |
| Benzo[a]pyrene (BaP)               | 61.2                    | 252 > 250                                         | 20                       | 125 > 124                            | 40                       |
| Indeno[1,2,3-cd]pyrene (IP)        | 70.8                    | 276 > 274                                         | 45                       | 137 > 136                            | 15                       |
| Dibenzo[a,h]anthracene (DBahA)     | 71.0                    | 278 > 276                                         | 40                       | 276 > 274                            | 45                       |
| Benzo[ghi]perylene (BghiP)         | 71.6                    | 276 > 274                                         | 45                       | 138 > 137                            | 15                       |
| Dibenzo[a,l]pyrene (DBalP)         | 74.9                    | 302 > 300                                         | 40                       | 150 > 149                            | 20                       |
| Dibenzo[a,e]pyrene (DBaeP)         | 75.9                    | 302 > 300                                         | 40                       | 150 > 149                            | 20                       |
| Dibenzo[a,i]pyrene (DBaiP)         | 76.5                    | 302 > 300                                         | 40                       | 150 > 149                            | 20                       |
| Dibenzo[a,h]pyrene (DBahP)         | 76.8                    | 302 > 300                                         | 40                       | 150 > 149                            | 20                       |

<sup>1</sup>internal standard.<sup>2</sup>mass-to-charge ratio.
